# Supplementary material for: Dual-frequency (Ka-band and G-band) radar estimates of liquid water content profiles in shallow clouds
Source: Copernicus journal article supplement (doi:10.5194/egusphere-2024-2090), 2024-07-12
Supplement: Supplementary file [file egusphere-2024-2090-AC1-supplement.pdf]

Dear Referee,

We would like to thank you for the very useful suggestions to improve the quality of the manuscript. Please see below our response to the comments.

All the changes are highlighted in the revised manuscript.

Sincerely,  
The Authors

### **General comments**

The authors demonstrate a differential absorption technique that combines coincident G-band and Ka-band radar observations to obtain vertical profiles of liquid water content (LWC) in shallow clouds. Compared to previous studies using W-band and Ka-band, the new technique results in lower uncertainties due to the increased frequency separation. The improvement due to the use of G-band data is shown both theoretically and from observations. The latter come from about 100 minutes of consecutive measurements of a shallow warm cloud of varying thickness observed during the Eastern Pacific Cloud Aerosol Precipitation Experiment (EPCAPE). The retrieved LWC profiles are compared with single-frequency retrievals as well as microwave radiometer measurements of liquid water path (LWP) and their adiabaticity is analyzed.

The paper is well written and easy to follow. The described technique combining Ka-band and G-band is novel and offers significant advantages over previous efforts in clouds with low LWP. It therefore clearly falls within the scope of AMT. However, I have several concerns that need to be addressed first. I recommend major revision.

### **Major comments**

1. It is not clear to me why the Ka- and W-band components from CloudCube are not used in this study. In Sect. 7 the LWC retrieval using Ka-W vs. W-G vs. Ka-G is discussed theoretically. However, I wonder why this was not also investigated using the CloudCube observations? Applying the same retrieval as for Ka-G to Ka-W and W-G and deriving uncertainties should clearly show the improvement using Ka-G band. The authors state in line 436 that a “triple-frequency system can be used to identify Mie scattering regions if Doppler is not available, and to facilitate the removal of biases and isolate sporadic instrument artifacts”. I wonder, why is this not done in this study? If the Ka and W-band CloudCube products are not operational yet or had data issues during this period, please say so in the manuscript.

We have added the following sentence (line 71-72):

“...the Ka-band and W-band channels of CloudCube did not have the sensitivity needed to detect the cloud formations of interest.”

2. I worry that presenting just one case study makes it easy to question the robustness of the results. To me, stating that LWC was retrieved from more than 15000 vertical profiles is questionable, because the retrieval was done for 60 s averages, if I understood correctly. Therefore,

LWC was retrieved for 100 profiles, right? Reading the number 15000 feels artificially inflated to me, especially considering that the KAZR data was interpolated. (I want to make clear here that I don't think this was done on purpose out of malicious intent or so.) I recommend including more cases (at least one more) such that the results are more robust. Maybe a case with lower drop concentration according to MODIS would add value to the discussion in Sect. 4?

We have added an additional case and modified the plots and manuscript accordingly. We have also used the number of averaged LWC profiles throughout the manuscript.

3. In my opinion, a greater effort to validate the LWC retrieval product not only in terms of column integrated values but also in terms of vertical structure could be taken. The authors could perform (microwave) radiative transfer simulations and forward simulate radar reflectivities given the retrieved amount of liquid water and the assumed drop distribution from Sect. 4. Radar simulators that are flexible in terms of instrument specifications and hydrometeor input are freely available, so I think this could be done without causing too much workload.

We intend to perform a more extensive validation of the retrieval technique in a future manuscript once more data are available. We have added the following paragraph at the end of the conclusion (line 492-498):

“Future work will be devoted to testing, improving, and validating the results retrieved in this work. KAZR and CloudCubeG will be participating in the Cloud and Precipitation Experiment at Kennaook (CAPE-k), where close to one-year worth of data will be available by the end of 2025. At CAPE-k, KAZR and CloudCubeG will be accompanied by the W-band ARM Cloud Radar (WACR), and we will exploit the availability of a triple-frequency radar system to benefit the LWC retrieval as described in Sect. 7. Finally, we intend to compare the results against a radiometer and single-frequency radar joint retrieval, as combining the radiometric observation of total optical depth with the radar capability of profiling can also be used to constrain the cloud LWC.”

4. The authors often use qualitative descriptions, such as “small” or “low” without specifying what they mean quantitatively. This should be clarified in the revision.

We have addressed this issue in the new version of the manuscript.

5. To my knowledge, figure captions should be limited to describing the figure and only include information necessary to read the figure. Discussion of the figure should be limited to the text. I recommend, the authors have a look at their figure captions again and rewrite where necessary. Also, I suggest writing out any abbreviations used in the figure for readers who only take a look at the figures without reading all of the text.

We have modified figures captions to delete unnecessary information and write out abbreviations.

### **Additional comments**

Line 15: Theoretically, ...

The recommendation has been accepted (line 15).

Line 18: Did you mean “remote sensing”?

The recommendation has been accepted (line 18).

Line 20: Please specify what “small” amounts of LWC means in terms of numbers.

We have added the following correction in line 20:

“...typical amounts of LWC smaller than  $1 \text{ gm}^{-3}$ .”

Line 23: Please specify what “low” LWP range means.

We have added the following correction in line 23:

“...(<  $200 \text{ gm}^{-2}$ )”

Line 32: To my knowledge low clouds over the subtropical oceans are one of the largest contributors to uncertainty in climate predictions. This could be stated more explicitly in this paragraph.

We have added the following sentence in line 29-30:

“Variability in the response of these clouds to anthropogenic warming remains a significant source of spread in climate change projections (Zelinka et al., 2020).”

Line 33/34: I don’t follow the logic here. To me, “difficult to model in simulations” does not necessarily lead to “inaccurate parameterizations”. Also “model in simulations” is a bit of a tautology. Maybe you can rephrase this sentence.

We have modified the paragraph (line 35-37):

“Given their characteristic thickness, shallow clouds are challenging to accurately represent in global-scale simulations. Incorporating additional experimental data can be of use to develop more appropriate parametrizations for climate models.”

Line 34: 2013 is quite a while ago. Are there more recent studies?

We have added two new and more recent references (line 37):

Medeiros, B., Shaw, J., Kay, J. E., and Davis, I.: Assessing clouds using satellite observations through three generations of global atmosphere models. *Earth and Space Sci.*, 10(7), e2023EA002918. <https://doi.org/10.1029/2023EA002918>, 2023.

Schneider, T., Leung, L. R., and Wills, R. C. J.: Opinion: Optimizing climate models with process knowledge, resolution, and artificial intelligence, *Atmos. Chem. Phys.*, 24, 7041–7062, <https://doi.org/10.5194/acp-24-7041-2024>, 2024.

Line 35: It should be their, right?

The recommendation has been accepted (line 38).

Line 35/36: You have not mentioned remote sensing yet, so I think “range gates” is too specific. I suggest “vertical profile” instead.

The recommendation has been accepted (line 38).

Line 38: What do you mean with usual small amounts? Please include typical amounts.

We have added the following correction in line 41:

“...(< 1 gm<sup>-3</sup>)”

Line 44: Do you mean “profile”?

The recommendation has been accepted (line 46).

Line 54: Using the term “new frontier” and citing a ten year old paper feels a bit iffy to me. I am aware (and appreciate) that you give a nice overview of recent studies in the following. Maybe just place the citation differently, e.g. after G-band radar instruments?

We have modified the sentence and added a new and more recent reference (line 56-57):

“G-band radar instruments are a recently-developed capability...”

Battaglia, A., Kollias, P., Dhillon, R., Roy, R., Tanelli, S., Lamer, K., Grecu, M., Lebsock, M., Watters, D., Mroz, K., Heymsfield, G., Li, L., and Furukawa, K.: Spaceborne cloud and precipitation radars: status, challenges, and ways forward, *Reviews of Geophysics*, 58, <https://doi.org/10.1029/2019rg000686>, 2020.

Line 66&71: It is not clear to me why you use KAZR instead of the Ka-band component of CloudCube. Please specify.

We have added the following sentence (line 71-72):

“...the Ka-band and W-band channels of CloudCube did not have the sensitivity needed to detect the cloud formations of interest.”

Line 71: Please specify the temporal resolution.

We have modified the sentence (line 75):

“...averaged over 60 s”

Line 74: I would recommend you insert references to the corresponding section here.

The recommendation has been accepted (line 76-80).

Line 86/87: If I am not mistaken, you do not specify the instrument model of the used ceilometer and radiometer. Please do so and include references.

We have added the following references in line 73-74:

Cadeddu, M. P.: Microwave Radiometer – 3-Channel (MWR3C) Instrument Handbook. U.S. Department of Energy, Atmospheric Radiation Measurement user facility, Richland, Washington.

DOE/SC-ARM-TR-300, 2024. Available online: [https://www.arm.gov/publications/tech\\_reports/handbooks/doe-sc-arm-tr-300.pdf](https://www.arm.gov/publications/tech_reports/handbooks/doe-sc-arm-tr-300.pdf), last access: September 13, 2024.

Morris, V. R.: Ceilometer Instrument Handbook. U.S. Department of Energy, Atmospheric Radiation Measurement user facility, Richland, Washington. DOE/SC-ARM-TR-020, 2016. Available online: [https://www.arm.gov/publications/tech\\_reports/handbooks/ceil\\_handbook.pdf](https://www.arm.gov/publications/tech_reports/handbooks/ceil_handbook.pdf), last access: September 13, 2024.

Line 88: Please either specify what periodical means or just write “radiosonde data have also been considered”.

The recommendation has been accepted (line 90).

Figure 1: To me the figure looks rather low quality, especially the white text.

We have improved the quality of Fig. 1.

Line 108/109: “based on criteria” sounds very vague, please specify.

We have deleted the sentence.

Line 112: Remove “in”

The recommendation has been accepted.

Line 115: Since you average your data before performing the LWC retrieval, I don’t think you can claim you retrieve LWC from more than 15000 vertical profiles.

We have used the number of averaged LWC profiles throughout the manuscript.

Line 120: How did you detect regions with precipitating drizzle from the ceilometer? Please specify.

We have modified the sentence (line 122):

“... we have excluded regions below the cloud base measured by the ceilometer.”

Line 123: please specify which parameters you use (temperature, relative humidity, pressure?)

We have added the following correction (line 124):

“...measurements of pressure, temperature, and relative humidity”

Line 125/126: Please quantify what you mean with “small”.

We have added the following correction (line 128):

“...less than 0.5 K, 7 hPa, and 3%, respectively”

Line 127: Again, please quantify what “small percentage” means.

We have added the following correction (line 129-131):

“Even if there had been a variation of 1 K, ... would be smaller than  $0.03 \text{ gm}^{-3}$ ...”

Line 133: Also here (small amounts of LWC and LWP). It’s also ok if you specify somewhere (for example in the introduction) that you refer to LWC below xx / LWP below yy as small.

We have added the following correction (line 100):

“...containing characteristic LWC and LWP amounts smaller than  $1 \text{ gm}^{-3}$  and  $200 \text{ gm}^{-2}$ , respectively.”

Line 136: Please specify the instrument model and how cloud base height is determined (it is sufficient to state "the internal ceilometer cloud base detection algorithm was used" if that's the case). Also please include the observation frequency, range resolution and uncertainty estimate (probably the range resolution?).

We have added the following sentence (line 134-135):

“...by the internal ceilometer cloud base detection algorithm (*ceil* data product) with temporal and range solutions of 16 s and 30 m, respectively.”

Line 137: I don’t think you have mentioned yet, how the correction was done (Rosenkranz?).

We have added the reference (line 137).

Figure 2: I am not a fan of rainbow colormaps and would highly recommend switching to a more color blind friendly colormap (e.g. the python colormaps viridis or plasma). Using a color blindness simulator I found the digital version is not ideal but ok (because the green is lighter than the red tone). However, the printed version of this plot is not readable for people with red-green vision deficiency.

We have used the parula colormap in the new version of the plots.

Figure 2: Please mention in the figure caption, if positive or negative doppler velocities mean towards the radar.

We have added the following sentence (line 147-148):

“Negative Doppler velocities correspond to particles moving towards the radar.”

Line 182: How rare? Please include percentage values or similar.

We have added the following correction (line 177):

“...(less than 1% of the total data)”

Line 192/193: “This is the two-way hydrometeor attenuation in the cloud depth.” Sounds awkward, can you maybe rephrase?

We have deleted the sentence.

Line 196: “most of the cases” or “most cases”

The recommendation has been accepted (line 192).

Line 198/199: Please specify that you mean 210-270 m above cloud base.

The recommendation has been accepted (line 195).

Figure 3 & 5: I suggest you plot the relative uncertainty as well.

The recommendation has been accepted.

Figure 3: Note what the arrow means in the figure caption.

We have added the following sentence (line 201):

“The arrow at minute 18 in (a) points at the profile used in Fig. 4.”

Line 221: “about” sounds awkward to my non-native speaker ears, but maybe that’s just me.

We have replaced “about” by “related to” (line 218).

Line 221: What does “short” mean? Please be more specific here.

We have changed the sentence (line 218):

“We fit a portion of the DFR(r) profile...”

Line 240: What is the optical length determined in Zhu et al. (2019)? Please include it here.

We have added the following (line 237):

“...of 187.5 m”

Line 254/255: Please state how many values are 0 within uncertainty ranges and how many negative results remain.

We have added the following (line 252):

“...more than 95% of”

Line 265: Please motivate why you jump from your DFR retrieval to a reflectivity-based approach (for validation? for evaluation which is better? etc)

We have added the following sentence (line 266-267):

“These relationships provide a straightforward approach to estimate the LWC and can also serve as a point of comparison for different techniques.”

Line 276: Be specific and state which cases (Miles and Matrosov? Just Miles?)

We have corrected the sentence and added the reference (line 276):

“...for the two cases in Miles et al. (2000)”

Line 280-282: “The drop concentration and distribution width in Miles et al. (2000) were  $N_0 = 75 \text{ cm}^{-3}$  (for maritime clouds) or  $N_0 = 280 \text{ cm}^{-3}$  (for continental clouds) and  $\sigma = 0.38$  (for both cases), respectively.” -> awkward sentence, can you rephrase it?

We have modified the sentence (line 280-281):

“In Miles et al. (2000), the drop concentration was found to be  $75 \text{ cm}^{-3}$  for maritime clouds and  $280 \text{ cm}^{-3}$  for continental clouds, while the distribution width was 0.38 for both cases.”

Line 289: Do you mean realistic?

The recommendation has been accepted (line 289).

Line 294: I don't get the reasoning. Why don't you use the  $400 \text{ cm}^{-3}$  from MODIS?

Note that the MODIS overpasses did not coincide in time with our observations. We prefer to use a more conservative number for this calculation.

Eq 6: I don't see a good correlation with your retrieval. Is there a physical reason why  $b$  must be 0.5?

$b$  is most commonly taken equal to 0.5 because of the proportionality of  $Z$  and  $LWC$  to different moments of the drop size distribution ( $Z$  proportional to  $D^6$  and  $LWC$  proportional to  $D^3$ ).

Line 300: liquid water content -> LWC

The recommendation has been accepted (line 301).

Line 314: Same as for the ceilometer. Please specify which instrument was used and which algorithm to retrieve LWP.

We have added the data product and the reference (line 321).

Line 322: How much does this depend on the drop concentration? How does it look for 200 or  $400 \text{ cm}^{-3}$ ? (Is this the reason why you chose  $300 \text{ cm}^{-3}$ ?)

Note that the parameter  $a$  in Eq. (6) accounts for a range of drop concentrations  $> 300 \text{ cm}^{-3}$  (and a range of distribution widths).

Line 343: To me, the spread in RMS highlights why this study would benefit from more cases.

We have added one more case.

Figure 9: Can you include uncertainties for MWR and KAZR-CloudCubeG LWP? Maybe also for Eq. 9 using a realistic range of drop concentrations?

The uncertainties for MWR and KAZR-CloudCubeG LWP are around  $10 \text{ gm}^{-2}$ , which would be barely visible in the plot. We prefer not to include uncertainties to provide a cleaner plot.

Line 360-362: Very long sentence, maybe split in two for better readability?

We have corrected the sentence (line 366-367):



“To assess the thermodynamic behavior of the shallow cloud, we can compare the linearity of the LWC retrieval to the adiabatic case where the LWC increases linearly with range.”

Line 375/376: What do you mean with the same thickness? Same within +/- 30 m?

We have added the following correction (line 380):

“...in steps of 30 m.”

Line 377: I know this will be typeset later, but how the unit is split is ugly.

This has been corrected in the new version.

Figure 10: Can you include standard deviation as shaded areas?

The recommendation has been accepted.

Line 405: I suggest adding “to our knowledge”

The recommendation has been accepted (line 411).

Line 451/452: Include references here.

To our understanding, references should be avoided in the conclusion. Previous works related to this particular sentence are referenced in the introduction (line 44-46).

Line 456: Where did you demonstrate this? → Add references to the respective figure(s) or section(s).

We have added the following correction (line 465):

“...in Sect. 3.2”

Line 462: Please state more clearly that the 15000 profiles are from one case study. (Also I’m still not convinced you can claim you use 15000 profiles to retrieve LWC).

We have used the number of averaged LWC profiles throughout the manuscript.

Line 470: I suggest you write out abbreviations at least once in the conclusions. Many people will only read abstract and conclusions.

The recommendation has been accepted.

Line 478: The “very” is not necessary, I think “valuable” is convincing enough.

The recommendation has been accepted.
